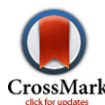

# The Nijmegen Decision Tool for Chronic Low Back Pain. Development of a Clinical Decision Tool for Secondary or Tertiary Spine Care Specialists

Miranda L. van Hooff<sup>1\*</sup>, Jan van Loon<sup>2</sup>, Jacques van Limbeek<sup>3</sup>, Marinus de Kleuver<sup>2,4</sup>

**1** Sint Maartenskliniek, Department of Research, Nijmegen, The Netherlands, **2** Sint Maartenskliniek, Department of Orthopedics, Nijmegen, The Netherlands, **3** Achmea Health Insurance Company, Zeist, The Netherlands, **4** VU University Medical Center, Department of Orthopedics, Amsterdam, The Netherlands

## Abstract

**Background:** In Western Europe, low back pain has the greatest burden of all diseases. When back pain persists, different medical specialists are involved and a lack of consensus exists among these specialists for medical decision-making in Chronic Low Back Pain (CLBP).

**Objective:** To develop a decision tool for secondary or tertiary spine care specialists to decide which patients with CLBP should be seen by a spine surgeon or by other non-surgical medical specialists.

**Methods:** A Delphi study was performed to identify indicators predicting the outcome of interventions. In the preparatory stage evidence from international guidelines and literature were summarized. Eligible studies were reviews and longitudinal studies. Inclusion criteria: surgical or non-surgical interventions and persistence of complaints, CLBP-patients aged 18–65 years, reported baseline measures of predictive indicators, and one or more reported outcomes had to assess functional status, quality of life, pain intensity, employment status or a composite score. Subsequently, a three-round Delphi procedure, to reach consensus on candidate indicators, was performed among a multidisciplinary panel of 29 CLBP-professionals (>five years CLBP-experience). The pre-set threshold for general agreement was  $\geq 70\%$ . The final indicator set was used to develop a clinical decision tool.

**Results:** A draft list with 53 candidate indicators (38 with conclusive evidence and 15 with inconclusive evidence) was included for the Delphi study. Consensus was reached to include 47 indicators. A first version of the decision tool was developed, consisting of a web-based screening questionnaire and a provisional decision algorithm.

**Conclusions:** This is the first clinical decision tool based on current scientific evidence and formal multidisciplinary consensus that helps referring the patient for consultation to a spine surgeon or a non-surgical spine care specialist. We expect that this tool considerably helps in clinical decision-making spine care, thereby improving efficient use of scarce sources and the outcomes of spinal interventions.

**Citation:** van Hooff ML, van Loon J, van Limbeek J, de Kleuver M (2014) The Nijmegen Decision Tool for Chronic Low Back Pain. Development of a Clinical Decision Tool for Secondary or Tertiary Spine Care Specialists. PLoS ONE 9(8): e104226. doi:10.1371/journal.pone.0104226

**Editor:** Dino Samartzis, University of Hong Kong, Hong Kong

**Received:** April 11, 2014; **Accepted:** July 9, 2014; **Published:** August 18, 2014

**Copyright:** © 2014 van Hooff et al. This is an open-access article distributed under the terms of the Creative Commons Attribution License, which permits unrestricted use, distribution, and reproduction in any medium, provided the original author and source are credited.

**Data Availability:** The authors confirm that all data underlying the findings are fully available without restriction. All relevant data are within the paper and its Supporting Information files. We confirm that all relevant data underlying the findings in our study are freely available in the manuscript.

**Funding:** The authors have no support or funding to report.

**Competing Interests:** At the time of this research project, Dr. Van Limbeek was Director of Research, Development and Education of Sint Maartenskliniek and was involved in the project as epidemiologist and statistician. He left Sint Maartenskliniek in 2012 and is currently affiliated with the Health Insurance Company Achmea, where he was appointed as manager research ad interim and medical advisor. He contributed to the work reported in this article during his time in the Sint Maartenskliniek (epidemiological guidance, methodology) and in the writing of the manuscript during his time at Achmea. There is no conflict of interest or any proprietary issue with Achmea health care insurance. The authors confirm that this does not alter their adherence to PLOS ONE policies on sharing data and materials.

\* Email: m.vanhooff@maartenskliniek.nl

## Introduction

In Western Europe, Low back pain (LBP) is considered to have the greatest burden of disease for society [1]. In this global burden of disease study LBP is ranked higher than for example cancer, heart disease, cerebrovascular disease, chronic obstructive pulmonary disease and asthma, osteoarthritis or diabetes. In the Netherlands, approximately 44% of the population experiences at least once an episode of LBP, with one in five reporting

persistent back pain resulting in chronic low back pain (CLBP; LBP lasting for more than three months [2,3]) with substantial limitations in functional activities after one year [4,5]. As the prevalence of CLBP appears to be increasing [6], CLBP is not only a burden for the patient but the related healthcare costs and productivity due to absence of work have a high health and socioeconomic impact on western societies [7–9]. Not surprisingly, CLBP is among the most common complaints of patients visiting a medical specialist in secondary care, i.e. spine surgeons, physiat-

rists, rheumatologists, pain consultants. The high number of CLBP patients overwhelms these healthcare providers and a significant number of second opinions and re-interventions are evident. With the limited health care budgets and given the high prevalence of CLBP and its substantial socioeconomically impact, it is essential to use resources of healthcare providers efficiently and to triage CLBP patients adequately in order to make sure that these patients see the right care giver timely. However, as yet such a valid classification system or decision tool is lacking and secondary care medical specialists are failing to reliably identify which patients will benefit from which surgical or non-surgical intervention.

One challenge in the development of a decision tool is that the CLBP population is heterogeneous. Therefore, it is unlikely that one intervention benefits all [10]. A longstanding duration of complaints is the only one common defining feature. It makes CLBP a complex problem and in fact it is a symptom referring to the location of the problem rather than a specific diagnosis [11]. The term itself is non-diagnostic for an underlying pathology and lacks specificity. Many authors have emphasized the biopsychosocial influences on the development CLBP and persistence of symptoms [12,13] and a broad multidimensional approach is widely recognised. However, the failure to differentiate between underlying causes is one of the reasons that various surgical and non-surgical interventions exist for the same problem [14]. Moreover, studies evaluating these interventions for CLBP have led to inconsistent results [3,15–19] and rarely show more than a small to moderate overall benefit [3,20,21].

It is suggested that several different CLBP patient profiles might be identified which are likely to benefit from different recommended interventions [1,18,19,22–25]. These profiles are based on indicators modifying the effects of interventions [26] and with that related to the outcomes [24]. The ultimate outcomes of spinal interventions are patients' improved quality of life, restored functional status and relieved pain [27]. However, due to methodological heterogeneity, the current evidence is inconclusive regarding predictive indicators for a successful treatment outcome. Even though it is recognized that CLBP 'without biological causes' has to be distinguished from other spinal disorders that respond reliably to surgery [25,28], a recently performed nationwide survey among Dutch spine surgeons showed that even in the group 'with presumed biological causes' a lack of consensus exists in surgical decision making [29]. To distinguish patient profiles several treatment outcome-based classifications for decision making exist. However, they are all developed and studied as a guide for non-surgical interventions applied in primary care [24]. As a challenge with probably the greatest potential for improving outcomes and efficiently guiding patients to the right secondary health care professional (e.g. spine surgeon, pain consultant, physiatrist, rheumatologist), it is recommended to develop a classification system to direct CLBP patients, presented in secondary or tertiary back care, to both surgical and non-surgical interventions, based on biomedical and psychosocial indicators [11,22–25,30,31].

Therefore, the purpose of this study is to develop a clinical decision tool for CLBP, based on evidence in international guidelines and literature, and expert panel consensus using indicators predicting a successful treatment outcome. The decision tool supports secondary or tertiary back care specialists to decide which patients should be considered for a surgical intervention and which patients for a non-surgical intervention and therefore, it aims to triage patients to the appropriate health care professional. The ultimate goal is to improve treatment outcomes and to reduce related costs for society.

## Methods

This study aimed to identify indicators predicting the outcome of interventions and the persistence of CLBP complaints by two stages: a preparatory stage followed by a three-round Delphi study. The preparatory stage consisted of a literature review. As we expected inconclusive evidence in the literature, a formal consensus (Delphi) procedure among a heterogeneous panel of experts in the CLBP field was planned and performed. We used a Modified Delphi Technique in order to realise an optimal integration of research-based knowledge and the clinical experience of experts [32] on this topic. Having identified the predictive indicators, a clinical decision tool, including a screening questionnaire and a provisional decision algorithm, was compiled. In the flow diagram of Figure 1 the overall process of the development of the Nijmegen decision tool for CLBP is presented.

### Preparatory stage: Evidence from literature

The indicator set from which a clinical decision tool can be constructed is based on evidence found in international guidelines and in the literature, as these guidelines are normative for evidence based daily practice. As a starting point, the clinical flag approach [33] for clinical decision-making in CLBP and the indicators as recommended in the guidelines [22,23,34], are used. We performed a literature review searching for indicators predicting outcome of invasive or non-invasive interventions and persistence of CLBP. Appropriate studies were traced using MedLine, EMBASE and the Cochrane Library. The most relevant used search terms were: 'back pain' [MesH], 'chronic', 'predict', 'prognosis' [MesH], 'persistent', 'treatment outcome' [MesH], 'rehabilitation' [MesH], 'surgery' [MesH]. The search was restricted to include systematic and narrative reviews, randomized controlled trials (RCT) and prospective cohort studies. Studies were included when 1) CLBP was the primary complaint; 2) published in the period 2000–2010; 3) involved either surgical interventions for CLBP or non-surgical interventions or persistence of CLBP complaints; 4) age between 18–65 years; 5) baseline measures of predictive indicators are reported, as the time of assessment may influence the prognostic value of treatment outcome [35,36]; 6) at least one of the reported outcome measures had to assess functional status, quality of life, pain intensity, employment status or a composite score. CLBP was defined as more than three months continual or recurrent episodes of LBP [2,3].

There were no language restrictions. Moreover, reference lists of included articles were scrutinized to identify articles not captured in the database search. When a systematic review was included, the original longitudinal studies (RCT or observational) of that systematic review were excluded from the current sample to avoid duplication or double use of the same data.

We used four international guidelines [22,23,31] and one national guideline [34]. The literature search revealed 33 relevant papers: eight systematic reviews [36–43], four narrative reviews [44–47], three randomized studies [48–50], and eighteen observational studies [51–68]. All potential predictive indicators were classified into five main domains: sociodemographic; pain; somatic; psychological; and functioning & quality of life. Of each paper, data of available evidence was extracted regarding the predictive values of measured baseline determinants (indicators). The evidence is weighed according to the Levels of Evidence as defined by the Oxford Centre for Evidence-Based Medicine [69]. Per indicator the evidence is categorized into four categories: 1) indicator with proven predictive value (PV; evidence found that the concerning indicator has predictive value), 2) indicator with

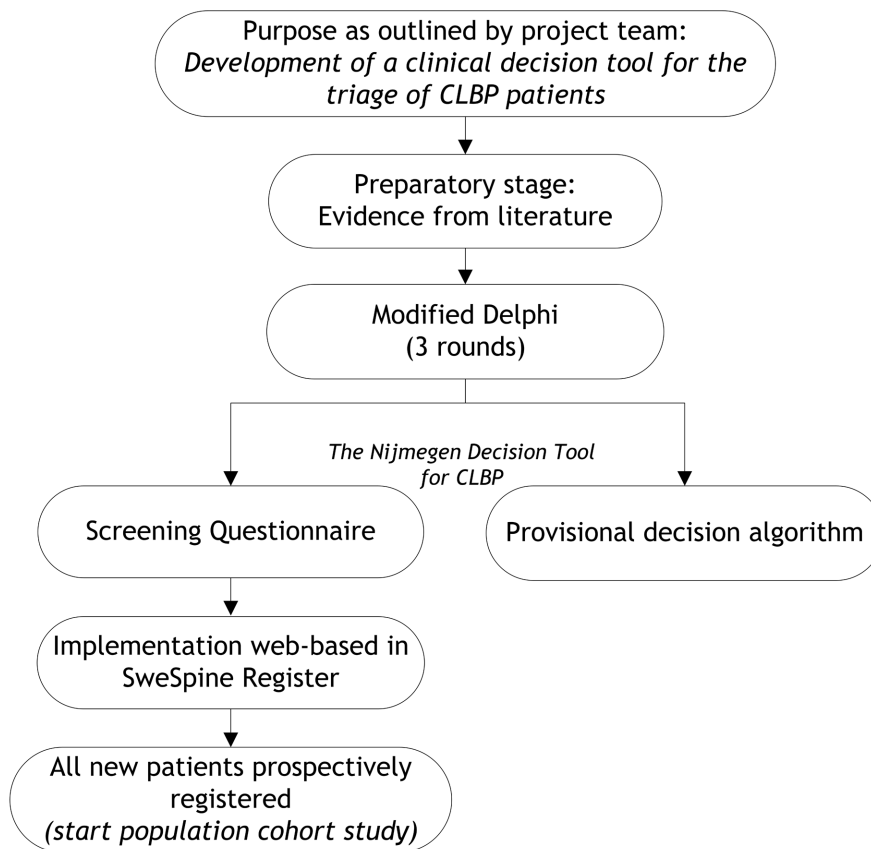

**Figure 1. Flow diagram of the development of the Nijmegen Decision Tool for CLBP.**  
doi:10.1371/journal.pone.0104226.g001

proven no predictive value (NP; evidence found that the concerning indicator has no predictive value), 3) indicator with inconclusive evidence (I; conflicting evidence found), and 4) indicator with no evidence found in literature (N). Subsequently, all indicators (PV, NP, and I) were selected and used for Phase 2 of this study (the Delphi Study). Indicators with non-predictive value and categorized NP were excluded from the sample as the evidence showed no predictive value for treatment outcome or for persistence of CLBP complaints. The included indicators are summarized in an evidence table, according to the design used in the related studies (data available in Table S1). Per indicator the evidence was summarized: the evidence is conclusive and of predictive value (C: PV) or the evidence is conclusive and of no predictive value (C: NP) or inconclusive evidence (I). These results are used in the Delphi study (Delphi-1 & 2).

### Delphi Study

The Delphi technique is a commonly used method to develop clinical guidelines [70] and also used in healthcare indicator research [71]. The technique was originally developed in the 1950s by Dalkey and Helmer at the RAND Corporation as a method of eliciting and refining group judgements [72]. Delphi may be characterized as a systematic method for structuring a group communication process so that the process is effective in allowing a group of experts or 'expert panel', as a whole, to deal with a complex problem [73]. The method relies on three key features: 1) anonymous response to guarantee equality in experts opinions, 2) iteration and controlled feedback, and 3) statistical analysis of group responses [72]. The Delphi technique, as recently

described [32,71], is a structured process that uses a recommended series of two or three rounds to gather expert opinions. When reaching consensus is difficult or consensus is unclear a physical panel meeting at the end is recommended, under the condition that the meeting should be well structured and should take place in favourable conditions (surrounding and environment) with a moderator (process leader), who is not one of the panellists, to contain the influence of dominant personalities (Modified Delphi Technique).

**Project team.** A project team was formed to conduct the process and the research and comprised a methodologist who is also a physician and who has a background in statistics (JvL), an orthopaedic spine surgeon (MdK) and a health scientist (MvH). The responsibilities of this project team were performing a review of clinical predictive indicators, weighing the evidence for each indicator, selecting a panel of experts, developing the questionnaires, organisation and conduct of email rounds and consensus meeting, analysing the responses, and compiling a draft version of the clinical decision tool.

**Panellists.** In the area of CLBP treatment different medical specialists are involved and knowledge gaps exist between different medical specialties [24]. Therefore, a heterogeneous group of experts was selected for the expert panel. Moreover, it is known that when exploring areas of uncertainty, a heterogeneous group is appropriate [70] and it is expected that heterogeneity in a decision-making group may lead to better performance [71]. Panellists were asked based on their willingness to participate, their intention to commit to the process, and their recognised knowledge of the topic. They were recruited in one hospital and

were included in the panel when they met the following criteria: (1) professional background as a orthopaedic spine surgeon, anaesthesiologist & pain consultant, physiatrist, rheumatologist, psychologist, physical therapist, occupational therapist, psychomotor therapist, nurse practitioner; (2) CLBP care and cure is the main area of professional attention; (3) more than five years of clinical experience in the field; and (4) ability and willingness to respond to each email Delphi round within one week and to join the final Delphi consensus meeting.

**Delphi procedure.** The panellists were emailed explaining the purpose and the content of the study. To increase participation the panellists were asked to reply if they were willing to join and whether they intended to commit to the procedure. The whole procedure was performed in two months, April–May 2011. Two email Delphi rounds were planned to reach consensus. Consensus was defined as a ‘general agreement of a substantial majority’. The threshold for general agreement was set at  $\geq 70\%$ . If an indicator reached a second time disagreement, the indicator is rejected. For the two email rounds participants were asked to respond and reply within one week. A third round, the final consensus meeting was performed to reach consensus about the included items and to construct a first draft clinical decision tool. During this meeting participants were allowed to discuss issues and exchange views supported by evidence, with the aim to resolve issues for indicators that had not passed the threshold for consensus. In each round the purpose and procedure of the current Delphi round and following Delphi rounds were explained.

**Delphi-1.** The initial draft list of indicators extracted from the literature review and arranged in a conceptual framework of domains was provided to the expert panel. They were asked to respond to three main sets of questions (Q). The Q1 set was based on international and national guidelines, which recommend an assessment of a minimal set of consistent prognostic indicators influencing the treatment outcome [22,23,31,74]. Compiled by the project team and supported by the literature review, this minimal set consisted of 32 indicators (‘red’ and ‘yellow’ flags, expectation of recovery, socio-economic status, sick leave, pain severity, prior episodes of LBP), for which agreement (YES or NO) was asked. The Q2 set was based on the results of the literature review and included 26 indicators with weighted evidence for which agreement for inclusion (YES or NO) was asked. Moreover, in Q3 the panellists were given the opportunity to suggest additional indicators for inclusion, based on scientific evidence and provided to the project team, and to write general comments. The items for which  $\geq 70\%$  agreement was reached were selected and included in the draft list for the final Consensus meeting (Delphi-3). The indicators for which consensus was not reached, were included in round 2 (Delphi-2).

**Delphi-2.** In the second round an anonymous feedback report with a summary of results of Delphi-1 was provided. In this summary an overview of results for each question and each indicator was given in count and percentages of agreement. Moreover, all suggested and newly formulated indicators, including the arguments and comments were presented. The Delphi-2 questionnaire contained both those indicators that did not reach the pre-set agreement level of  $\geq 70\%$  (Q1 and Q2; Delphi-1) and those that were newly formulated by the panellists (Q3; Delphi-1). In this round the panellists were requested to indicate with YES or NO which of the indicators of Q1 and Q2 absolutely needed to be included in the list? In Q3 a possibility was given to mention new indicators. The level of agreement was set at  $\geq 70\%$  among the panellists, i.e. these indicators were selected and included in the draft list for the following Consensus meeting (Delphi-3). A second time lack of consensus led to rejection of the concerning indicator.

**Delphi-3 Consensus meeting.** Before the meeting all panellists received a covering summary of results on both Delphi rounds which was similarly described and drafted as for the results of the first round. Moreover, a draft list was provided with indicators for which consensus ( $\geq 70\%$ ), no consensus ( $< 70\%$ ) was reached, and the rejected indicators. During the meeting all indicators for which previously no consensus had been reached were reconsidered. Only if new arguments based on scientific or clinical evidence were provided, an attempt to reach a new consensus on that item was made. Moreover, the panellists were encouraged to consider alternative views when consensus could not be achieved [70]. The meeting had a formal character to ensure that all panellists had a chance to express their views, all indicators were considered, no discussion was allowed and only arguments could be provided, and the panellists made judgements individually. Consensus was reached by voting; raising hands. Only those indicators with  $\geq 70\%$  agreement were included in the final screening questionnaire, all others were rejected. A dedicated and independent process leader is a key element for a successful consensus meeting; this person facilitates the exchange of relevant information [70]. One of the project team members (JvL) is an experienced Delphi round facilitator, who was not one of the panellists, but who ensured that the process ran smoothly and that good-quality un-biased decisions were made. The project leader (MvH), not a member of the expert panel, assisted the process leader in process monitoring, ensured that all procedures ran according to the rules, counted the votes, compiled the minutes during the meeting and provided a full report after the meeting. The report included the followed procedures, the results of the voting rounds, the course of the discussions, the decisions made, and the final list of ‘consensus indicators’. All panellists who joined the consensus meeting received a copy.

### Development of the ‘Nijmegen decision tool for CLBP’

The final list of ‘consensus indicators’ was used to compile a first version of the clinical decision tool. For the screening questionnaire existing international patient reported outcome measures (PROMs) were screened to identify whether the indicators are covered by these PROMs. The indicators were compared to existing questions used in the Swedish Spine Register (Swespine [www.4S.nu]). These questions were translated and screened for unambiguity and whether they measured the construct as intended by the indicator. The remaining indicators were converted to new questions. The screening questionnaire was built in the Dutch patient interface of Swespine. Based on the list of consensus indicators, international guidelines, and current practice a provisional decision algorithm was constructed.

## Results

### Preparatory stage: Evidence from literature

An initial draft list with 58 candidate indicators, categorized in five domains, and including the evidence was compiled. Table 1 shows the evidence summarized for all candidate indicators (the evidence and references per indicator are available in Table S1). For 38 (66%) candidate indicators conclusive evidence was found indicating a predictive value for treatment outcome or persistence of complaints (C: PV), 15 had inconclusive evidence for predicting outcome or persistence of pain complaints (I), and for five indicators conclusive evidence was found that the concerning indicator is of no predictive value (C: NP). These five indicators were removed from the initial draft list, leaving 53 candidate indicators and they were included in the Delphi study.

**Table 1.** Results Preparatory stage: Evidence from literature.

| Domain                  | Category <sup>1</sup>                            | Study design <sup>2</sup> |     |    |    | Evidence <sup>3</sup> |
|-------------------------|--------------------------------------------------|---------------------------|-----|----|----|-----------------------|
|                         |                                                  | SR                        | RCT | PC | NR |                       |
|                         |                                                  | n                         | n   | n  | n  |                       |
| <b>Sociodemographic</b> | <b>Personal</b>                                  |                           |     |    |    |                       |
|                         | Age                                              | 4                         | -   | 8  | 4  | I                     |
|                         | Gender                                           | 4                         | -   | 9  | 3  | I                     |
|                         | Ethnicity                                        | 1                         | -   | -  | -  | C: PV                 |
|                         | Body weight                                      | 3                         | -   | 1  | -  | I                     |
|                         | Marital status <sup>†</sup>                      | 3                         | -   | -  | 2  | C: NP                 |
|                         | <b>Health</b>                                    |                           |     |    |    |                       |
|                         | Smoking                                          | 5                         | -   | 4  | 1  | I                     |
|                         | Previous back surgery                            | 1                         | -   | 2  | -  | C:PV                  |
|                         | Use of analgesics                                | 1                         | -   | 1  | 1  | I                     |
|                         | <b>Social</b>                                    |                           |     |    |    |                       |
|                         | Education                                        | 1                         | -   | 3  | 3  | I                     |
|                         | Social status                                    | 1                         | -   | -  | 1  | I                     |
|                         | Functioning – leisure                            | 1                         | -   | 1  | -  | I                     |
|                         | Social support                                   | -                         | -   | -  | 2  | C: PV                 |
|                         | <b>Work</b>                                      |                           |     |    |    |                       |
|                         | Socio-economic status*                           | 2                         | -   | 2  | 2  | C: PV                 |
|                         | Work satisfaction                                | 5                         | -   | -  | 4  | I                     |
|                         | Functioning – work                               | 3                         | -   | -  | -  | I                     |
|                         | Sick leave*                                      | 3                         | -   | 2  | 2  | C: PV                 |
|                         | Compensation                                     | 3                         | -   | 3  | -  | I                     |
|                         | Litigation                                       | -                         | -   | -  | 1  | C: PV                 |
|                         | Work ability                                     | 1                         | -   | -  | -  | C: PV                 |
|                         | Work adjustment                                  | 1                         | -   | -  | -  | C: PV                 |
|                         | Physical strenuousness                           | 1                         | -   | -  | -  | I                     |
| <b>Pain</b>             | Duration                                         | 4                         | -   | 3  | 1  | I                     |
|                         | Intensity*                                       | 5                         | 1   | 11 | 3  | C: PV                 |
|                         | Intensity – back                                 | -                         | -   | 3  | -  | C: PV                 |
|                         | Intensity – leg                                  | 2                         | -   | 2  | -  | C: PV                 |
|                         | Interference daily activities                    | 2                         | -   | -  | 1  | C: PV                 |
|                         | Frequency/preceding (prior) episodes*            | 1                         | -   | 1  | 2  | I                     |
| <b>Somatic</b>          | Diagnosis; co morbidities                        | 1                         | -   | 2  | 1  | C: PV                 |
| Physical & Biological   | Bulging or protruded disc*                       | 2                         | -   | 2  | -  | C: PV                 |
|                         | Loss of neurological function*                   | 1                         | -   | 1  | 1  | C: PV                 |
|                         | Red flags (n = 10)* <sup>#</sup>                 |                           |     |    |    | C: PV                 |
|                         | Strength; endurance; mobility <sup>†</sup>       | 4                         | -   | 2  | -  | C: NP                 |
|                         | Central sensitisation <sup>†</sup>               | 1                         | -   | -  | -  | C: NP                 |
|                         | Postural control; psychomotor speed <sup>†</sup> | 1                         | -   | -  | -  | C: NP                 |
| <b>Psychologic</b>      | <b>Psychic affect</b>                            |                           |     |    |    |                       |
|                         | Distress*                                        | 6                         | 2   | 3  | 4  | C: PV                 |
|                         | Anxiety*                                         | 3                         | 2   | 2  | 4  | C: PV                 |
|                         | <b>Cognition</b>                                 |                           |     |    |    | C: PV                 |
|                         | Catastrophizing*                                 | 5                         | 3   | 7  | 3  | C: PV                 |
|                         | Somatization*                                    | 4                         | -   | 1  | 1  | C: PV                 |
|                         | Coping*                                          | 5                         | -   | 2  | 4  | C: PV                 |
|                         | Intelligence <sup>†</sup>                        | 1                         | -   | -  | -  | C: NP                 |
|                         | <b>Behaviour</b>                                 |                           |     |    |    |                       |

Table 1. Cont.

| Domain                                   | Category <sup>1</sup>                     | Study design <sup>2</sup> |            |           |           | Evidence <sup>3</sup> |
|------------------------------------------|-------------------------------------------|---------------------------|------------|-----------|-----------|-----------------------|
|                                          |                                           | <i>SR</i>                 | <i>RCT</i> | <i>PC</i> | <i>NR</i> |                       |
|                                          |                                           | n                         | n          | n         | n         |                       |
|                                          | Fear of movement/(re)injury*              | 3                         | -          | 12        | 4         | C: PV                 |
|                                          | Expectations – work return*               | 1                         | -          | 3         | 2         | C: PV                 |
|                                          | Expectations – outcome/recovery*          | 2                         | -          | 1         | 2         | C: PV                 |
|                                          | Self-efficacy (incl. Readiness-to-change) | -                         | -          | 1         | -         | C: PV                 |
|                                          | Pain avoidance & pain persistence         | -                         | 1          | -         | -         | C: PV                 |
| <b>Functioning &amp; Quality of Life</b> | Functioning in daily activities & walking | 6                         | 1          | 9         | 3         | C: PV                 |
|                                          | Health-related physical functioning       | 3                         | -          | 5         | 1         | C: PV                 |
|                                          | Health-related mental functioning         | 6                         | -          | 1         | 1         | I                     |
|                                          | General perceived health                  | 1                         | -          | 2         | 1         | C: PV                 |

Initial draft list with indicators (n = 58) indicating a predictive value for treatment outcome or persistence of back pain, categorized in domains, including the number of studies found per study design and the resulting evidential value.

1. \*Recommended in (inter-) national guidelines;

#Pain started age <20 or >50 years, recent trauma, constant progressive pain, history of malignancies, prolonged use of corticosteroid use, HIV, recent unexplained weight loss, structural deformity, infectious disease (CBO 2010).

2. *SR* Systematic Review; *R* Randomized Clinical Trial; *PC* Prospective Cohort study; *NR* Narrative Review; *n* number of studies.

3. *I* Inconclusive evidence; *C* Conclusive evidence; *PV* Predictive Value; *NP* No Predictive value.

4. †Not included for phase 2 Delphi Study.

doi:10.1371/journal.pone.0104226.t001

## Delphi Study

**Participants.** A panel of 29 experts met the inclusion criteria and agreed to participate (orthopaedic spine surgeon [n = 7], anaesthesiologist & pain consultant [n = 3], physiatrist [n = 3], rheumatologist [n = 1], psychologist [n = 4], physical therapist [n = 7], occupational therapist [n = 1], psychomotor therapist [n = 1], nurse practitioner [n = 2]).

The response rate for the first Delphi round (Delphi-1) was 76% (n = 22) and for Delphi-2 69% (n = 20). The main reason for not responding in the first two rounds was due to absence from work and none of the approached panellists did not respond on both email rounds. All 29 panellists (100%) attended the final consensus meeting (Delphi-3).

**Delphi-1.** As shown in Figure 2, 48 indicators were selected in the first round based on consensus ( $\geq 70\%$  agreement level). For five indicators consensus was not reached. Moreover, 26 indicators were newly formulated by the panel in the open end question (sociodemographic n = 9; pain n = 4; somatic n = 7; psychologic n = 3; functioning and quality of life n = 3) and these indicators were added to the Delphi-2 questionnaire. These 26 indicators consisted of:

- six indicators mentioned in the Dutch guidelines for general practitioners: self-management of complaints, previous interventions, daily course of pain complaints, influence of rest, mobility and posture, previous episodes, and comorbidities (range and severity) [75]. The last two show overlap with previously identified indicators.
- one indicator for inflammatory LBP (Calin criteria [76]).
- ten newly formulated indicators with overlap with indicators of the initial draft list.
- nine indicators with no predictive evidence and were rejected from the sample.

No further comments were made.

**Delphi-2.** As shown in Figure 2, 22 indicators were presented, including the 17 newly formulated and the five indicators for which no consensus was reached in Delphi-1. Of these, 14 reached the pre-set  $\geq 70\%$  agreement level for consensus. Five indicators were rejected as for the second time no consensus was reached. No new indicators were suggested and no further comments were made.

**Delphi-3 Consensus meeting.** All indicators on which consensus were reached in either Delphi-1 or 2 (62 indicators; 48+14) and those indicators no consensus was reached in Delphi-2 (3 indicators) were briefly discussed (Figure 2). After each indicator the panellists voted whether they still agreed or not. As shown in Table 2, at the meeting consensus was reached for 47 indicators (pre-set  $\geq 70\%$  agreement level), whereas eight indicators reached no consensus. These indicators were rejected, as well as ten indicators showing an overlap with the initial indicators.

Consensus was reached to re-formulate one indicator 'Body weight' into 'Body weight & BMI' and another indicator 'Pain-interference daily activities' switched domains from 'Pain' to the domain 'Functioning & Quality of Life'.

The remaining 47 indicators formed the backbone of the screenings questionnaire (36 with conclusive evidence for predictive value [77%] and 11 with inconclusive evidence; Table 2).

## The 'Nijmegen decision tool for CLBP'

A first version of a clinical decision tool consisting of two parts was drafted by the project team: (1) A screening questionnaire, including all 47 indicators, and (2) a provisional decision algorithm.

**1. The screening questionnaire.** For the backbone of the screening questionnaire existing international patient reported outcome measures (PROMs) with well-established psychometric properties were screened to identify whether the 47 identified indicators were covered by these existing questionnaires (Table 3). Four of the 47 indicators are outcome indicators and adequately measured by the Oswestry Disability Index (ODI, version 2.1a) for

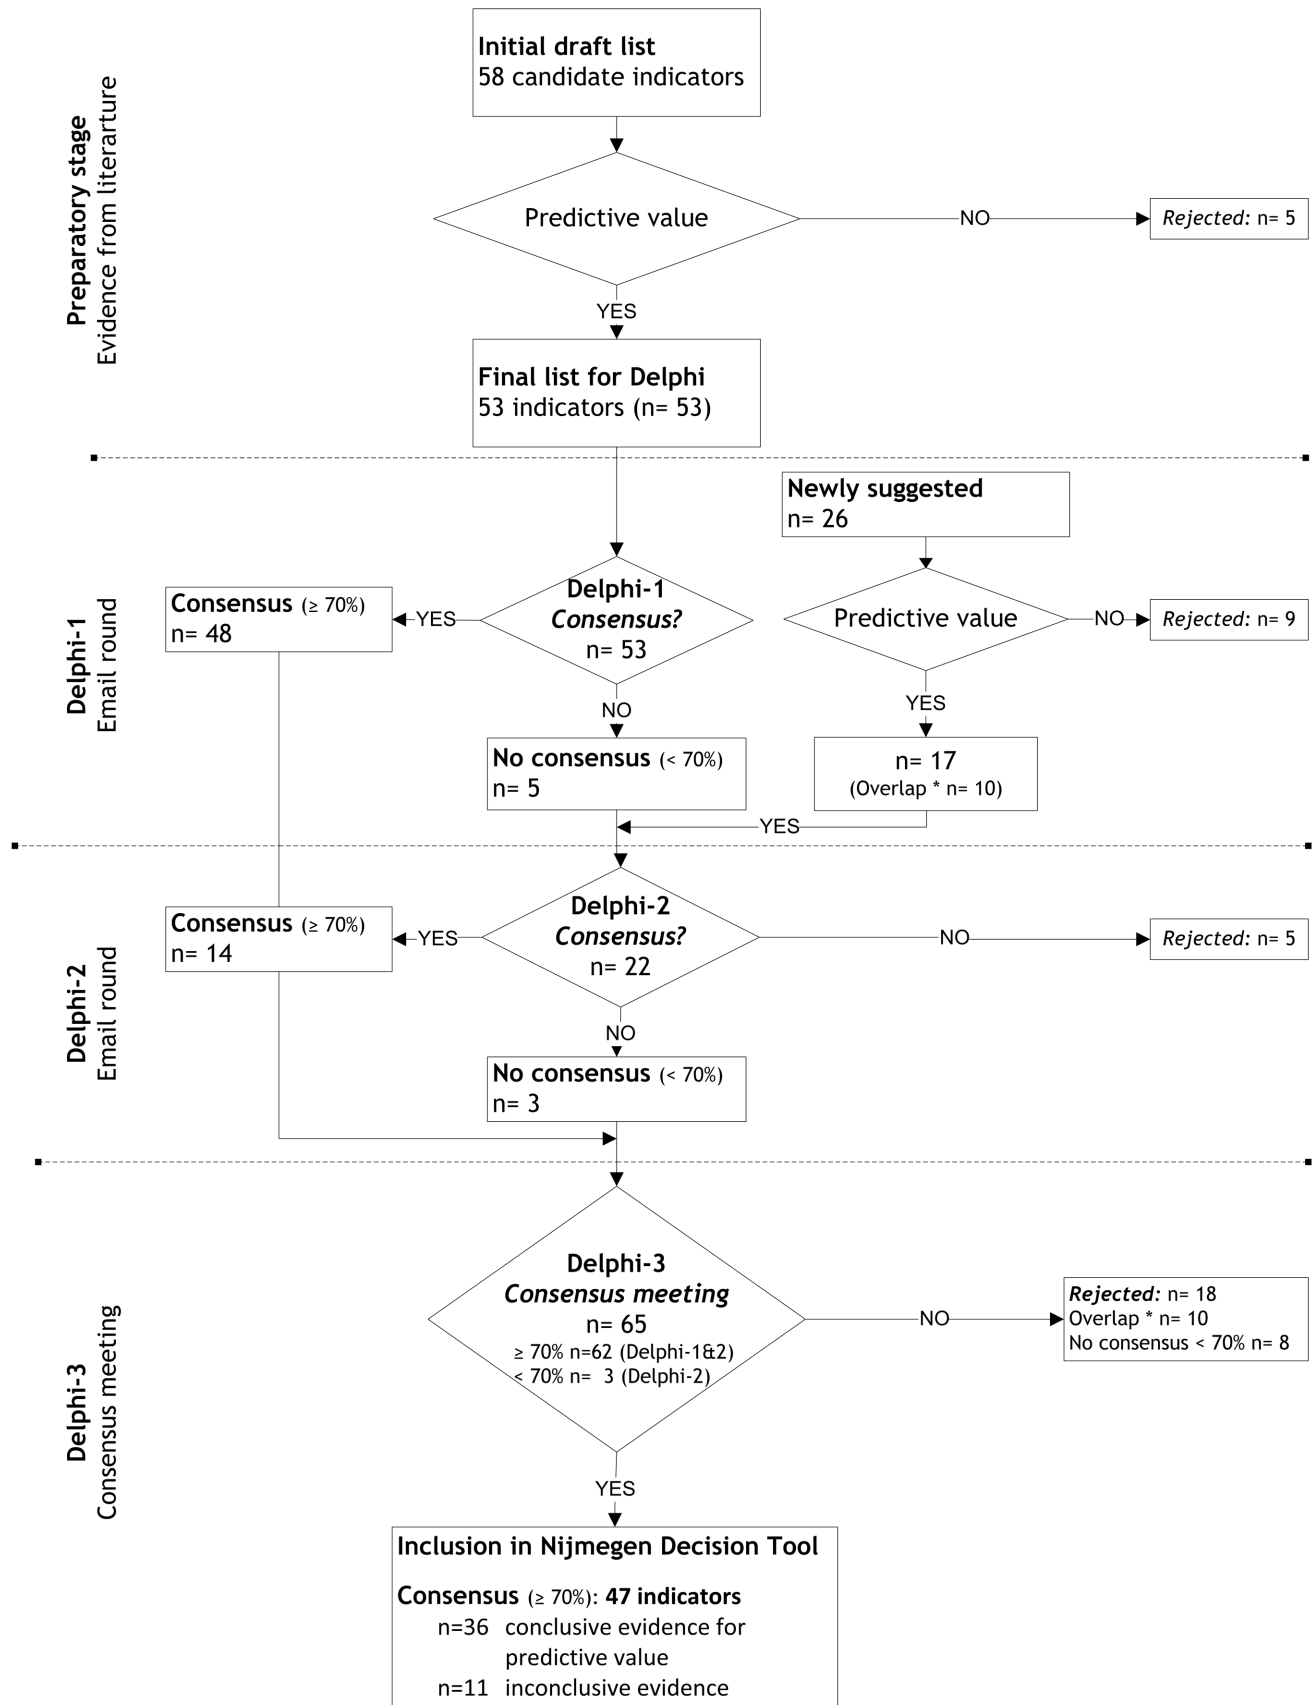

\* overlap double in the definition of indicators

**Figure 2. Results of the Delphi Study.** At each stage of the Delphi study the expert panel consensus for presented indicators is shown. To reach consensus the level of agreement was set at  $\geq 70\%$ . Indicators reaching full consensus were included in the Nijmegen Decision Tool. doi:10.1371/journal.pone.0104226.g002

functional status, the Short-Form 36 Health Survey Questionnaire (SF36) and the EuroQol (EQ-5D) for quality of life, and the Numeric Rating Scale (NRS) for back and leg pain. The STarT back is used as a screening tool for identifying the amount of risk for three psychological indicators (distress, catastrophizing, and fear of movement/(re)injury; i.e. 'yellow flags'). The remaining 40 indicators were compared to existing questions in the Swespine register. Analogous questions were translated and the remaining indicators were added as dichotomous or multiple choice questions in the final questionnaire. The complete screening questionnaire is available from the authors.

**2. The provisional decision algorithm.** The provisional decision algorithm is based on the flag approach and based on current practice. The red flag signs are thought to be associated with underlying pathology. Therefore, in the algorithm the presence of  $\geq 1$  red flag (e.g. previous history of malignancies, trauma) is indicative for a consultation by a spinal surgeon, whereas a high risk on yellow flags (i.e. distress, catastrophizing cognitions) is second most decisive as a high risk on yellow flags might be predictive for treatment failure.

## Discussion

The purpose of this study was to develop a clinical decision tool for secondary or tertiary care specialists to decide which patients with chronic low back pain (CLBP) should be seen by a spine surgeon for consideration of a beneficial surgical intervention (including invasive pain management), and which patients in the future should best be seen by other medical specialists, e.g. physiatrists, rheumatologists or pain consultants. A study, consisting of a preparatory stage in which evidence from literature was summarized followed by a three-round Delphi study, contributed to the developed Nijmegen clinical decision tool for CLBP, which includes 1) a patient-based and web-based screening questionnaire and 2) a provisional decision algorithm.

In the preparatory stage of this study, we included in the literature review the evidence found in international guidelines [22,23,31] and the evidence from one national guideline [34], as these guidelines are normative for evidence based daily practice. However, studies included in these guidelines have led to inconsistent results and rarely show more than small to moderate overall benefit for different types of interventions, which makes it difficult to interpret which patient benefits from which intervention. Therefore, we performed a literature search covering the whole spectrum of CLBP ignoring specific medical specialties (explicit knowledge). This is supplemented by professional state-of-the-art knowledge derived from experiences in daily practice and collegial meetings and conferences, in a formal consensus (Delphi) study (implicit knowledge).

### 1. The screening questionnaire

The literature search revealed a large number of published studies ( $n = 33$ ) related to the identification of predictive indicators for a successful treatment outcome or the prediction of persistence of CLBP complaints. As expected the result of this study is a long list of predictive indicators ( $n = 47$ ), with most of them (77%) having scientific evidence for predictive value. To list and classify the indicators in Table 2 and 3 we used the conceptual model of patient outcomes (Poolman 2009) and identified five main domains: Sociodemographic, Pain, Somatic, Psychologic, and

Functioning and Quality of Life. Overall, we found strong predictive evidence for successful outcome of spinal surgery for: previous back surgery and biological indicators (i.e. diagnosis; comorbidities as diabetes, bulging or protruded disc, loss of neurological function, and 'red flags'). In this study consensus was reached to add BMI and smoking as indicators in the screening questionnaire and to evaluate their contribution to outcome of surgical interventions over time. Although the evidence is growing that high BMI [77] and smoking [63,64,78–80] are predictive for a poor outcome after surgery, the current scientific evidence is still inconclusive. Along with the predictive value of psychological indicators (yellow flags) [38,39,48] and expectations for treatment outcome [37,43,78] and work return [37,43,56], predictive indicators as high disability [36,38,39,48,80], being unemployed [37,43,64], and being involved in litigation and/or compensation claims [36,39,41,51,63,66,78] seem to lead to unfavourable outcome for all CLBP interventions.

### 2. The provisional decision algorithm

For this study we used the recommended clinical flag approach [33] for clinical decision-making in CLBP as a starting point [22,23,74]. A diagnostic triage based on 'red flag' signs is recommended [22,74,81] as red flag signs are features thought to be associated with a high risk of serious underlying disorders, such as infection, inflammatory disease, cancer or fracture [33,82] or nerve root disease [46]. The presence of a red flag alerts clinicians to the need for further examination and specific management [82–84]. In this study consensus was reached that the presence of one or more red flag signs is indicative for a consultation by a spinal surgeon, which was incorporated as a first step in the provisional decision algorithm. However, the guideline recommendations on diagnostic triage based on red flags are still not very strong [81]. Most of the patients with back pain show at least one positive red flag and do not have a serious underlying condition. Taking the guideline recommendations literally could cause harm. These harms include unnecessary diagnostics, unnecessary exposure to radiation, as well as unnecessary treatments, including surgery [85]. Moreover, a summary [86] of two recently published Cochrane reviews aiming to detect the diagnostic accuracy of red flags to screen for vertebral fracture [84] and malignancy [83] concluded that a lack of evidence exists that one red flag used in isolation can be used to aid a clinician's judgement. We expect that combinations of red flags and clinical features might appear more informative to assist clinical decision-making [83,84,86]. Even though it is recommended to assess the so-called yellow flags [22,23] as well, it remains unclear what these indicators contribute to actual clinical decision-making. Large prospective studies are needed to evaluate the contribution of these indicators to successful treatment outcome. In this study consensus was reached that a high risk on yellow flags is the second most decisive for surgical or non-surgical interventions. We currently perform further studies to examine multifactorial diagnostic models and with that, the scientific value of combinations of flags and indicators, collected by means of the screening questionnaire, in clinical decision-making for further diagnostics and/or treatment.

CLBP is a multifactorial health condition and therefore, it has been widely recommended to develop a classification system or a decision tool to direct CLBP patients to interventions based on



**Table 2.** Results of the Delphi Study.

| Domain                                  | Category                                         | Evidence              |   |
|-----------------------------------------|--------------------------------------------------|-----------------------|---|
| <b>Sociodemographic</b>                 | <b>Personal</b>                                  |                       |   |
|                                         | Age                                              | I                     |   |
|                                         | Gender                                           | I                     |   |
|                                         | Body weight & BMI                                | I                     |   |
|                                         | <b>Health</b>                                    |                       |   |
|                                         | Smoking                                          | I                     |   |
|                                         | Previous back surgery                            | C                     |   |
|                                         | Use of analgesics                                | I                     |   |
|                                         | <i>Self-management of complaints</i>             | C                     |   |
|                                         | <i>Interventions in the past</i>                 | C                     |   |
|                                         | <b>Social</b>                                    |                       |   |
|                                         | Social status                                    | I                     |   |
|                                         | Functioning – leisure                            | I                     |   |
|                                         | Social support                                   | C                     |   |
|                                         | <b>Work</b>                                      |                       |   |
|                                         | Socio-economic status*                           | C                     |   |
|                                         | Work satisfaction                                | I                     |   |
|                                         | Functioning – work                               | I                     |   |
|                                         | Sick leave*                                      | C                     |   |
|                                         | Litigation                                       | C                     |   |
| <b>Pain</b>                             | Duration                                         | I                     |   |
|                                         | Intensity*                                       | C                     |   |
|                                         | Intensity – back                                 | C                     |   |
|                                         | Intensity – leg                                  | C                     |   |
|                                         | Frequency/preceding (prior) episodes*            | I                     |   |
|                                         | <i>Daily course of pain complaints</i>           | C                     |   |
|                                         | <i>Influence of rest, mobility, and posture</i>  | C                     |   |
| <b>Somatic</b><br>Physical & Biological | Diagnosis; co morbidities (Red Flag)             | C                     |   |
|                                         | Bulging or protruded disc* (Red Flag)            | C                     |   |
|                                         | Loss of neurological function* (Red Flag)        | C                     |   |
|                                         | Red flags (n = 11)*                              | C                     |   |
|                                         | Pain started age <20 or >50 years                |                       |   |
|                                         | Significant trauma                               |                       |   |
|                                         | Pain is constant and non-mechanical              |                       |   |
|                                         | Pain in thoracic spine                           |                       |   |
|                                         | Deformities (i.e. scoliosis, lumbar kyphosis)    |                       |   |
|                                         | Previous history of malignities/cancer           |                       |   |
|                                         | History of intravenous drug use                  |                       |   |
|                                         | AIDS/HIV                                         |                       |   |
|                                         | Currently steroid use                            |                       |   |
|                                         | Recent unexplained weight loss                   |                       |   |
|                                         | <i>Calin criteria for axial spondylarthritis</i> | C                     |   |
|                                         | <b>Psychologic</b>                               | <b>Psychic affect</b> |   |
|                                         |                                                  | Distress*             | C |
| Anxiety*                                |                                                  | C                     |   |
| <b>Cognition</b>                        |                                                  |                       |   |
| Catastrophizing*                        |                                                  | C                     |   |
| Somatization*                           |                                                  | C                     |   |
| Coping*                                 |                                                  | C                     |   |
| <b>Behaviour</b>                        |                                                  |                       |   |

**Table 2.** Cont.

| Domain                                   | Category                                  | Evidence |
|------------------------------------------|-------------------------------------------|----------|
|                                          | Fear of movement/(re)injury*              | C        |
|                                          | Expectations – work return*               | C        |
|                                          | Expectations – outcome/recovery*          | C        |
| <b>Functioning &amp; Quality of Life</b> | Functioning in daily activities & walking | C        |
|                                          | Pain-interference daily activities        |          |
|                                          | Health-related physical functioning       | C        |

\* Recommended in international guidelines.

Newly formulated indicators are printed in italics.

/ Inconclusive evidence; C Conclusive evidence.

Final list with 'full consensus' indicators categorized in domains, including the resulting evidential value.

doi:10.1371/journal.pone.0104226.t002

biomedical and psychosocial indicators [11,22–25,30,31]. To date we are not aware of any study covering the whole spectrum and to our knowledge the Nijmegen decision tool for CLBP is the first published patient screening questionnaire and provisional decision algorithm. The backbone of the screening questionnaire consists of Dutch versions of international validated PROMs. To be able to make our future study results comparable and to be able to perform benchmark studies in the future, we selected commonly used PROMs covering those indicators that are treatment outcome-related (functioning in daily activities with ODI, quality of life with SF36 and EQ5D, and pain intensity with NRS) [87]. These PROMs are also used in the Swedish Spine Register (Swespine [www.4S.nu]). To screen yellow flags and determine the risk of psychological influence on treatment outcome we implemented the Dutch version of the STarT back screening tool [88–90]. Although validated and useful in primary care [88,91–93] further research is needed to evaluate the validity and feasibility of prognostic screening with this tool in secondary or tertiary back care. To our knowledge, for the remaining indicators of the screening questionnaire no validated and reliable questionnaires exist. Large and methodological sound studies are needed for the feasibility and validity of these questions and whether (a combination of) these indicators contribute to successful treatment outcome.

In March 2012 the screening questionnaire was implemented in the Dutch patient interface of the Swespine. Swespine was chosen as it is one of the largest, oldest and most studied national

registries, which covers both PROMs and clinical results [94], which allows benchmarking data in future. After pilot testing and some minor adjustments (e.g. grammatical and spelling mistakes, wording of questions, and technical issues related to the system), the web-based register started in May 2012. The registry is an ideal instrument to obtain meaningful data prospectively, to define normative values, to identify patient profiles, to confirm differences in treatment outcomes for subpopulations [25,95]. The results can be used for quality assurance, quality improvement and for research purposes [94]. To study the provisional clinical decision algorithm, since May 2012 all LBP patients referred to our clinic complete the screening questionnaire web-based and treated patients are systematically followed over time for two years by completing the same PROMs at predefined follow-up moments. With that, in future it should be possible to identify patient profiles (phenotypes) predicting a beneficial treatment outcome for each type of surgical or non-surgical intervention, for all the referred, treated and untreated patients. At the same time data of the individual patients are presented in PDF-format in the electronic medical record (EMR) of the patient and contributes to individual decision-making in the clinic.

### Strengths and Weaknesses

Although for 36 of the 47 indicators conclusive evidence is available in the literature that they have predictive value for treatment outcome in patients with CLBP, for 11 indicators the

**Table 3.** Backbone screening questionnaire.

| Domains                                  | Flag approach <sup>33</sup> | Results Phase 2 (current study) Indicators (n = 47) | Questions                               |
|------------------------------------------|-----------------------------|-----------------------------------------------------|-----------------------------------------|
| <b>Sociodemographic</b>                  | Blue & Black                | 13                                                  | Multiple choice                         |
|                                          |                             | 3                                                   | Dichotomous                             |
| <b>Pain</b>                              | n.a.                        | 5                                                   | Multiple choice                         |
|                                          |                             | 2                                                   | NRS (0–10)*                             |
| <b>Somatic</b>                           | Red                         | 14                                                  | Dichotomous                             |
| <b>Psychosocial</b>                      | Yellow                      | 3                                                   | STarT back screening tool <sup>88</sup> |
|                                          |                             | 4                                                   | Multiple choice                         |
|                                          |                             | 1                                                   | Dichotomous                             |
| <b>Functioning &amp; Quality of Life</b> | n.a.                        | 2                                                   | ODI (v2.1a); SF36; EQ-5D*               |

\* standard & agreed to implement in Swespine register www.4s.nu.

doi:10.1371/journal.pone.0104226.t003

evidence was inconclusive. These indicators were included in the Delphi study, based on the expert opinion of a panel of LBP clinicians. However, the formal, structured, and systematic character of the Modified Delphi Technique is of great value in indicator research when scientific evidence for indicators is inconclusive or lacking [71]. Moreover, to overcome the knowledge gaps existing between different medical specialties in the CLBP field [24], we used this technique in a multidisciplinary panel of specialists as it is argued to successfully bring together and to synthesize the knowledge of the whole expert group [71]. All health professionals came from one hospital specialised in spine care and the generalisation to other secondary or tertiary spine practices in other countries and healthcare environments might be limited. Strength of this study is that the panel included diverse professionals covering the secondary surgical and non-surgical CLBP care. Moreover, the decision tool is based on international accepted guidelines and evidence published in literature, covering the whole spectrum of CLBP. We weighed the evidence in literature according to the Levels of Evidence [69]. By combining this explicit knowledge with the implicit knowledge of the expert panel in the three-round Delphi study, after refinement of the decision algorithm, and after validation of the tool in other settings, we expect that the Nijmegen Decision Tool for CLBP could be used in general secondary and tertiary spine care.

## References

- Murray CJ, Vos T, Lozano R, Naghavi M, Flaxman AD, et al. (2012) Disability-adjusted life years (DALYs) for 291 diseases and injuries in 21 regions, 1990–2010: a systematic analysis for the Global Burden of Disease Study 2010. *Lancet* 380: 2197–2223
- Frymoyer JW (1992) Predicting disability from low back pain. *Clin Orthop Relat Res*: 101–109
- Henschke N, Kuijpers T, Rubinstein SM, van Middelkoop M, Ostelo R, et al. (2012) Trends over time in the size and quality of randomised controlled trials of interventions for chronic low-back pain. *Eur Spine J* 21: 375–381
- Von Korf M, Saunders K (1996) The course of back pain in primary care. *Spine (Phila Pa 1976.)* 21: 2833–2837
- Picavet HS, Schouten JS (2003) Musculoskeletal pain in the Netherlands: prevalences, consequences and risk groups, the DMC(3)-study. *Pain* 102: 167–178
- Freburger JK, Holmes GM, Agans RP, Jackman AM, Darter JD, et al. (2009) The rising prevalence of chronic low back pain. *Arch Intern Med* 169: 251–258
- Dagenais S, Caro J, Haldeman S (2008) A systematic review of low back pain cost of illness studies in the United States and internationally. *Spine J* 8: 8–20
- Lambeek LC, van Tulder MW, Swinkels IC, Koppes LL, Anema JR, et al. (2011) The trend in total cost of back pain in The Netherlands in the period 2002 to 2007. *Spine (Phila Pa 1976.)* 36: 1050–1058
- van Tulder MW (2011) Health technology assessment (HTA) increasingly important in spine research. *Eur Spine J* 20: 999–1000
- Turk DC (2005) The potential of treatment matching for subgroups of patients with chronic pain: lumping versus splitting. *Clin J Pain* 21: 44–55
- Bederman SS (2010) Predicting prognosis in sick-listed low back pain patients: sneaking a peak inside the black box. *Spine J* 10: 728–730
- Truchon M (2001) Determinants of chronic disability related to low back pain: towards an integrative biopsychosocial model. *Disabil Rehabil* 23: 758–767
- Weiner BK (2008) Spine update: the biopsychosocial model and spine care. *Spine (Phila Pa 1976.)* 33: 219–223
- Haldeman S, Dagenais S (2008) A supermarket approach to the evidence-informed management of chronic low back pain. *Spine J* 8: 1–7
- Fairbank J, Frost H, Wilson-MacDonald J, Yu LM, Barker K, et al. (2005) Randomised controlled trial to compare surgical stabilisation of the lumbar spine with an intensive rehabilitation programme for patients with chronic low back pain: the MRC spine stabilisation trial. *BMJ* 330: 1233
- Mirza SK, Deyo RA (2007) Systematic review of randomized trials comparing lumbar fusion surgery to nonoperative care for treatment of chronic back pain. *Spine (Phila Pa 1976.)* 32: 816–823
- Brox JI, Nygaard OP, Holm I, Keller A, Ingebrigtsen T, et al. (2010) Four-year follow-up of surgical versus non-surgical therapy for chronic low back pain. *Ann Rheum Dis* 69: 1643–1648
- van Middelkoop M, Rubinstein SM, Kuijpers T, Verhagen AP, Ostelo R, et al. (2011) A systematic review on the effectiveness of physical and rehabilitation interventions for chronic non-specific low back pain. *Eur Spine J* 20: 19–39
- Jacobs WC, Rubinstein SM, Koes B, van Tulder MW, Peul WC (2013) Evidence for surgery in degenerative lumbar spine disorders. *Best Pract Res Clin Rheumatol* 27: 673–684

## Conclusion

This study has provided the first clinical decision tool for CLBP patients, based on current scientific evidence and formal consensus, covering the whole spectrum of CLBP. We expect that this relatively simple tool will considerably help a daily spine practice in clinical decision-making 1) to select the right CLBP patients for the right interventions, thereby improving the outcomes of spinal interventions, and 2) lead to a reduction in healthcare costs by reducing the number of inappropriate referrals to spine care professionals.

## Supporting Information

**Table S1 Preparatory stage - Summarized evidence and References per indicator.**  
(PDF)

## Author Contributions

Conceived and designed the experiments: MvH J. van Limbeek MdK. Performed the experiments: MvH J. van Loon J. van Limbeek MdK. Analyzed the data: MvH J. van Limbeek MdK. Contributed reagents/materials/analysis tools: MvH J. van Limbeek MdK. Contributed to the writing of the manuscript: MvH J. van Loon J. van Limbeek MdK.

- Hall H, McIntosh G (2008) Low back pain (chronic). *Clin Evid (Online)* 2008
- Wand BM, O'Connell NE (2008) Chronic non-specific low back pain - subgroups or a single mechanism? *BMC Musculoskelet Disord* 9: 11
- Airaksinen O, Brox JI, Cedraschi C, Hildebrandt J, Klüber-Moffett J, et al. (2006) Chapter 4. European guidelines for the management of chronic nonspecific low back pain. *Eur Spine J* 15 Suppl 2: S192–S300
- NICE (National Institute for Health and Clinical Excellence) (2009) Low back pain: early management of persistent non-specific low back pain. NICE Clinical Guideline 88. Available: <http://publications.nice.org.uk/low-back-pain-cg88>. Accessed 2014 Mar 24.
- Fairbank J, Gwilym SE, France JC, Daffner SD, Dettori J, et al. (2011) The role of classification of chronic low back pain. *Spine (Phila Pa 1976.)* 36: S19–S42
- Fourney DR, Andersson G, Arnold PM, Dettori J, Cahana A, et al. (2011) Chronic low back pain: a heterogeneous condition with challenges for an evidence-based approach. *Spine (Phila Pa 1976.)* 36: S1–S9
- Kamper SJ, Maher CG, Hancock MJ, Koes BW, Croft PR, et al. (2010) Treatment-based subgroups of low back pain: a guide to appraisal of research studies and a summary of current evidence. *Best Pract Res Clin Rheumatol* 24: 181–191
- McCormick JD, Werner BC, Shimer AL (2013) Patient-reported outcome measures in spine surgery. *J Am Acad Orthop Surg* 21: 99–107
- Glassman SD, Carreon LY, Anderson PA, Resnick DK (2011) A diagnostic classification for lumbar spine registry development. *Spine J* 11: 1108–1116
- Willems PC, Staal JB, Walenkamp GH, de Bie RA (2013) Spinal fusion for chronic low back pain: systematic review on the accuracy of tests for patient selection. *Spine J* 13: 99–109
- Koes BW, van Tulder MW, Thomas S (2006) Diagnosis and treatment of low back pain. *BMJ* 332: 1430–1434
- Chou R, Loeser JD, Owens DK, Rosenquist RW, Atlas SJ, et al. (2009) Interventional therapies, surgery, and interdisciplinary rehabilitation for low back pain: an evidence-based clinical practice guideline from the American Pain Society. *Spine (Phila Pa 1976.)* 34: 1066–1077
- Meijer R, Inhenfeldt D, Vermeulen M, De HR, van Limbeek J (2003) The use of a modified Delphi procedure for the determination of 26 prognostic factors in the sub-acute stage of stroke. *Int J Rehabil Res* 26: 265–270
- Main CJ, Williams AC (2002) Musculoskeletal pain. *BMJ* 325: 534–537
- CBO Kwaliteitsinstituut voor de Gezondheidszorg (2009) Keten Zorgrichtlijn Aspecifiek Lage Rugpijn. Available: <http://www.diliguide.nl/document/3272/keten-zorgrichtlijn-aspecifiek-lage-rugklachten.html>. Accessed 2014 Mar 24.
- Hasenbring M (1998) Predictors of efficacy in treatment of chronic low back pain. *Curr Opin Anaesthesiol* 11: 553–558
- van der Hulst M, Vollenbroek-Hutten MM, Ijzerman MJ (2005) A systematic review of sociodemographic, physical, and psychological predictors of multidisciplinary rehabilitation-or, back school treatment outcome in patients with chronic low back pain. *Spine (Phila Pa 1976.)* 30: 813–825
- Heitz CA, Hilfiker R, Bachmann LM, Joronen H, Lorenz T, et al. (2009) Comparison of risk factors predicting return to work between patients with subacute and chronic non-specific low back pain: systematic review. *Eur Spine J* 18: 1829–1835

38. den Boer JJ, Oostendorp RA, Beems T, Munneke M, Evers AW (2006) Continued disability and pain after lumbar disc surgery: the role of cognitive-behavioral factors. *Pain* 123: 45–52
39. Celestin J, Edwards RR, Jamison RN (2009) Pretreatment psychosocial variables as predictors of outcomes following lumbar surgery and spinal cord stimulation: a systematic review and literature synthesis. *Pain Med* 10: 639–653
40. Wessels T, van Tulder M, Sigl T, Ewert T, Limm H, et al. (2006) What predicts outcome in non-operative treatments of chronic low back pain? A systematic review. *Eur Spine J* 15: 1633–1644
41. Chou R, Shekelle P (2010) Will this patient develop persistent disabling low back pain? *JAMA* 303: 1295–1302
42. Pincus T, Burton AK, Vogel S, Field AP (2002) A systematic review of psychological factors as predictors of chronicity/disability in prospective cohorts of low back pain. *Spine (Phila Pa 1976)* 27: E109–E120
43. Aalto TJ, Malmivaara A, Kovacs F, Herno A, Alen M, et al. (2006) Preoperative predictors for postoperative clinical outcome in lumbar spinal stenosis: systematic review. *Spine (Phila Pa 1976)* 31: E648–E663
44. Melloh M, Elfering A, Egli PC, Roeder C, Barz T, et al. (2009) Identification of prognostic factors for chronicity in patients with low back pain: a review of screening instruments. *Int Orthop* 33: 301–313
45. Linton SJ (2000) A review of psychological risk factors in back and neck pain. *Spine (Phila Pa 1976)* 25: 1148–1156
46. Cohen SP, Argoff CE, Carragee EJ (2008) Management of low back pain. *BMJ* 337: a2718
47. Grotle M, Foster NE, Dunn KM, Croft P (2010) Are prognostic indicators for poor outcome different for acute and chronic low back pain consulters in primary care? *Pain* 151: 790–797
48. Smeets RJ, Vlaeyen JW, Kester AD, Knottnerus JA (2006) Reduction of pain catastrophizing mediates the outcome of both physical and cognitive-behavioral treatment in chronic low back pain. *J Pain* 7: 261–271
49. Flink IK, Boersma K, Linton SJ (2010) Catastrophizing moderates the effect of exposure in vivo for back pain patients with pain-related fear. *Eur J Pain* 14: 887–892
50. Hasenbring MI, Hallner D, Rusu AC (2009) Fear-avoidance- and endurance-related responses to pain: development and validation of the Avoidance-Endurance Questionnaire (AEQ). *Eur J Pain* 13: 620–628
51. Trief PM, Ploutz-Snyder R, Fredrickson BE (2006) Emotional health predicts pain and function after fusion: a prospective multicenter study. *Spine (Phila Pa 1976)* 31: 823–830
52. Swinkels-Meewisse IE, Roelofs J, Schouten EG, Verbeek AL, Oostendorp RA, et al. (2006) Fear of movement/(re)injury predicting chronic disabling low back pain: a prospective inception cohort study. *Spine (Phila Pa 1976)* 31: 658–664
53. Costa LC, Maher CG, McAuley JH, Hancock MJ, Herbert RD, et al. (2009) Prognosis for patients with chronic low back pain: inception cohort study. *BMJ* 339: b3829
54. Picavet HS, Vlaeyen JW, Schouten JS (2002) Pain catastrophizing and kinesiophobia: predictors of chronic low back pain. *Am J Epidemiol* 156: 1028–1034
55. Hasenbring MI, Plaas H, Fischbein B, Willburger R (2006) The relationship between activity and pain in patients 6 months after lumbar disc surgery: do pain-related coping modes act as moderator variables? *Eur J Pain* 10: 701–709
56. Johansson AC, Linton SJ, Rosenblad A, Bergkvist L, Nilsson O (2010) A prospective study of cognitive behavioural factors as predictors of pain, disability and quality of life one year after lumbar disc surgery. *Disabil Rehabil* 32: 521–529
57. Gheldof EL, Crombez G, Van den Bussche E, Vinck J, Van Nieuwenhuysse A, et al. (2010) Pain-related fear predicts disability, but not pain severity: a path analytic approach of the fear-avoidance model. *Eur J Pain* 14: 870–879
58. Martel MO, Thibault P, Sullivan MJ (2010) The persistence of pain behaviors in patients with chronic back pain is independent of pain and psychological factors. *Pain* 151: 330–336
59. Costa LC, Maher CG, McAuley JH, Hancock MJ, Smeets RJ (2011) Self-efficacy is more important than fear of movement in mediating the relationship between pain and disability in chronic low back pain. *Eur J Pain* 15: 213–219
60. Woby SR, Watson PJ, Roach NK, Urmston M (2004) Are changes in fear-avoidance beliefs, catastrophizing, and appraisals of control, predictive of changes in chronic low back pain and disability? *Eur J Pain* 8: 201–210
61. Goubert L, Crombez G, van Damme S (2004) The role of neuroticism, pain catastrophizing and pain-related fear in vigilance to pain: a structural equations approach. *Pain* 107: 234–241
62. Wideman TH, Adams H, Sullivan MJ (2009) A prospective sequential analysis of the fear-avoidance model of pain. *Pain* 145: 45–51
63. Carreon LY, Glassman SD, Djurasovic M, Dimar JR, Johnson JR, et al. (2009) Are preoperative health-related quality of life scores predictive of clinical outcomes after lumbar fusion? *Spine (Phila Pa 1976)* 34: 725–730
64. Atlas SJ, Keller RB, Wu YA, Deyo RA, Singer DE (2005) Long-term outcomes of surgical and nonsurgical management of lumbar spinal stenosis: 8 to 10 year results from the maine lumbar spine study. *Spine (Phila Pa 1976)* 30: 936–943
65. Sinikallio S, Aalto T, Lehto SM, Airaksinen O, Herno A, et al. (2010) Depressive symptoms predict postoperative disability among patients with lumbar spinal stenosis: a two-year prospective study comparing two age groups. *Disabil Rehabil* 32: 462–468
66. Jensen OK, Nielsen CV, Stengaard-Pedersen K (2010) One-year prognosis in sick-listed low back pain patients with and without radiculopathy. Prognostic factors influencing pain and disability. *Spine J* 10: 659–675
67. Peters ML, Vlaeyen JW, Weber WE (2005) The joint contribution of physical pathology, pain-related fear and catastrophizing to chronic back pain disability. *Pain* 113: 45–50
68. Harms MC, Peers CE, Chase D (2010) Low back pain: what determines functional outcome at six months? An observational study. *BMC Musculoskelet Disord* 11: 236
69. Oxford Centre for Evidence-based Medicine Levels of Evidence (2009) Levels of Evidence. Online source. Available: [www.ccbm.net](http://www.ccbm.net)
70. Murphy MK, Black NA, Lamping DL, McKee CM, Sanderson CF, et al. (1998) Consensus development methods, and their use in clinical guideline development. *Health Technol Assess* 2: i–88
71. Boukedi R, Abdoul H, Loustau M, Sibony O, Alberti C (2011) Using and reporting the Delphi method for selecting healthcare quality indicators: a systematic review. *PLoS One* 6: e20476
72. Dalkey NC (1969) The Delphi Method: An experimental study of group opinion. The Rand Corporation
73. Linstone AH, Turoff M (2002) The Delphi Method; Techniques and Applications.
74. CBO, Kwaliteitsinstituut voor de Gezondheidszorg (2009) Ketenzorrichtlijn Aspecifiek Lage Rugpijn. Available: <http://www.diliguide.nl/document/3272/ketenzorrichtlijn-aspecifiek-lage-rugklachten.html>. Accessed 2014 Mar 24.
75. Chavannes AW, Mens JMA, Koes BW, Lubbers WJ, Ostelo R, et al. (2005) NHG-Standaard Aspecifieke LageRugpijn. *Huisarts en Wetenschap* 48: 113–123
76. Rudwaleit M, Sieper J (2004) Diagnosis and early diagnosis of ankylosing spondylitis. *Z Rheumatol* 63: 193–202
77. Athiviraham A, Wali ZA, Yen D (2011) Predictive factors influencing clinical outcome with operative management of lumbar spinal stenosis. *Spine J* 11: 613–617
78. Soriano JC, Revuelta MS, Fuente MF, Diaz IC, Urena PM, et al. (2010) Predictors of outcome after decompressive lumbar surgery and instrumented posterolateral fusion. *Eur Spine J* 19: 1841–1848
79. Sanden B, Forsth P, Michaelsson K (2011) Smokers show less improvement than nonsmokers two years after surgery for lumbar spinal stenosis: a study of 4555 patients from the Swedish spine register. *Spine (Phila Pa 1976)* 36: 1059–1064
80. Pearson A, Lurie J, Tosteson T, Zhao W, Abdu W, et al. (2012) Who should have surgery for spinal stenosis? Treatment effect predictors in SPORT. *Spine (Phila Pa 1976)* 37: 1791–1802
81. Koes BW, van Tulder MW, Lin CW, Macedo LG, McAuley J, et al. (2010) An updated overview of clinical guidelines for the management of non-specific low back pain in primary care. *Eur Spine J* 19: 2075–2094
82. Centeno CJ, Elkins WL, Freeman M (2004) Waddell's signs revisited? *Spine (Phila Pa 1976)* 29: 1392
83. Henschke N, Maher CG, Ostelo RW, de Vet HC, Macaskill P, et al. (2013) Red flags to screen for malignancy in patients with low-back pain. *Cochrane Database Syst Rev* 2: CD008686
84. Williams CM, Henschke N, Maher CG, van Tulder MW, Koes BW, et al. (2013) Red flags to screen for vertebral fracture in patients presenting with low-back pain. *Cochrane Database Syst Rev* 1: CD008643
85. Underwood M, Buchbinder R (2013) Red flags for back pain *BMJ* 347: f7432
86. Downie A, Williams CM, Henschke N, Hancock MJ, Ostelo RW, et al. (2013) Red flags to screen for malignancy and fracture in patients with low back pain: systematic review. *BMJ* 347: f7095
87. Rihn JA, Berven S, Allen T, Phillips FM, Currier BL, et al. (2009) Defining value in spine care. *Am J Med Qual* 24: 4S–14S
88. Hill JC, Whitehurst DG, Lewis M, Bryan S, Dunn KM, et al. (2011) Comparison of stratified primary care management for low back pain with current best practice (STarT Back): a randomised controlled trial. *Lancet* 378: 1560–1571
89. van Hooff ML, van Lankveld W, Anderson P, Apeldoorn A, van Hartingveld F, et al. (2011) The STarT Back Screening Tool: Dutch version. Available: [http://www.keele.ac.uk/media/keeleuniversity/ri/primarycare/startbackmicro/Dutch\\_tool.pdf](http://www.keele.ac.uk/media/keeleuniversity/ri/primarycare/startbackmicro/Dutch_tool.pdf). Accessed 2014 Mar 24.
90. Apeldoorn A, van Hooff ML, Ostelo RWJG (2013) De STarT Back Screening Tool. *FysioPraxis*: 32–33
91. Morso L, Albert H, Kent P, Manniche C, Hill J (2011) Translation and discriminative validation of the STarT Back Screening Tool into Danish. *Eur Spine J* 20: 2166–2173
92. Kongsted A, Johannesen E, Leboeuf-Yde C (2011) Feasibility of the STarT back screening tool in chiropractic clinics: a cross-sectional study of patients with low back pain. *Chiropr Man Therap* 19: 10
93. Bruyere O, Demoulin M, Brereton C, Humblet F, Flynn D, et al. (2012) Translation validation of a new back pain screening questionnaire (the STarT Back Screening Tool) in French. *Arch Public Health* 70: 12
94. Stromqvist B, Fritzell P, Hagg O, Jonsson B, Sanden B (2013) Swespine: the Swedish spine register: the 2012 report. *Eur Spine J* 22: 953–974
95. Fritzell P, Stromqvist B, Hagg O (2006) A practical approach to spine registers in Europe: the Swedish experience. *Eur Spine J* 15 Suppl 1: S57–S63
