# Supplementary material for: The Nijmegen Decision Tool for Chronic Low Back Pain. Development of a Clinical Decision Tool for Secondary or Tertiary Spine Care Specialists
Source: PubMed Central journal article supplement (PMC4136789; doi:10.1371/journal.pone.0104226), 2014-08-18
Supplement: pone.0104226.s001.pdf [file pone.0104226.s001.pdf]

Supporting Information Table S1: Preparatory stage - Summarized evidence and References per indicator

| DOMAIN                                       | INDICATORS                                    | EVIDENCE        |          |              |               | Overall (weighted)                       | REFERENCES                                           |                              |              |
|----------------------------------------------|-----------------------------------------------|-----------------|----------|--------------|---------------|------------------------------------------|------------------------------------------------------|------------------------------|--------------|
|                                              |                                               | Persistence LBP | Surgical | Non-surgical |               |                                          | Persistence LBP                                      | Surgical                     | Non-surgical |
| <b>Sociodemographic</b>                      | <i>Personal</i>                               |                 |          |              |               |                                          |                                                      |                              |              |
|                                              | Age                                           | I               | I        | NP           | I (S)         | NP [41,44,47,60-61,67]; PV [45-46,52,66] | NP [38,63]; PV [39,43,55,65]                         | NP [36]; PV [66]             |              |
|                                              | Gender                                        | I               | I        | NP           | I (S)         | NP [41,44,47,52,58,60-61,67]; PV [45,66] | NP [55,65]; PV [39,43,51,56]                         | NP [36]                      |              |
|                                              | Marital status                                | NP              | NP       | N            | NP (S)        | NP [52,67]                               | NP [38,43,65]                                        |                              |              |
|                                              | Body weight                                   | I               | NP       | NP           | I (S)         | NP [41](weight); I [46](weight)          | NP [43](weight),[63](weight)                         | NP [36]                      |              |
|                                              | Ethnicity                                     | PV              | N        | N            | PV (W)        | PV [67]                                  |                                                      |                              |              |
|                                              | <i>Health</i>                                 |                 |          |              |               |                                          |                                                      |                              |              |
|                                              | Smoking                                       | I               | I        | NP           | I (S)         | NP [41,53]; PV [46]                      | NP [38,43]; PV [51,63-64]; I [39]                    | NP [36]                      |              |
|                                              | Previous back surgery                         | N               | PV       | N            | PV (S)        |                                          | PV [51,64]; I [39]                                   |                              |              |
|                                              | Use of analgesics                             | PV              | N        | I            | I (S)         | PV [53]                                  |                                                      | I [36]                       |              |
|                                              | <i>Social</i>                                 |                 |          |              |               |                                          |                                                      |                              |              |
|                                              | Education                                     | PV              | I        | N            | I (S)         | NP [46]; PV [45,47,52,53]; I [66]        | NP [64]; PV [38]                                     |                              |              |
|                                              | Social status                                 | PV              | PV       | NP           | I (S)         | PV [47]                                  |                                                      | NP [36]                      |              |
|                                              | Functioning - leisure                         | PV              | N        | PV           | I (S)         | PV [52]                                  |                                                      | PV [36]                      |              |
|                                              | Social support                                | PV              | PV       | N            | PV (W)        | PV [44-45]                               |                                                      |                              |              |
|                                              | <i>Work</i>                                   |                 |          |              |               |                                          |                                                      |                              |              |
|                                              | Socio-economic status *                       | PV              | PV       | N            | PV (S)        | NP [53,67]; PV [37,46-47]                | PV [43,64]                                           |                              |              |
|                                              | Work ability                                  | N               | N        | PV           | PV (S)        |                                          |                                                      | PV [36]                      |              |
|                                              | Work satisfaction                             | I               | I        | PV           | I (S)         | NP [41,45,47]; PV [37,44,46]             | PV [38]; I [39]                                      | PV [36]                      |              |
|                                              | Functioning - work                            | PV              | PV       | PV           | I (S)         | PV [41]                                  | PV [38]                                              | PV [36]                      |              |
| Work adjustment                              | N                                             | N               | PV       | PV (S)       |               |                                          | PV [36]                                              |                              |              |
| Physical strenuousness                       | N                                             | NP              | N        | NP (S)       |               | NP [43]                                  |                                                      |                              |              |
| Sick leave *                                 | PV                                            | PV              | I        | PV (S)       | PV [44,47,53] | NP [43]; PV [38,45]                      | I [36]                                               |                              |              |
| Compensation                                 | PV                                            | I               | I        | I (S)        | PV [41]       | PV [51, 63]; I [39]                      | PV [66]; I [36]                                      |                              |              |
| Litigation                                   | PV                                            | N               | N        | PV (W)       | PV [46]       |                                          |                                                      |                              |              |
| <b>Pain</b>                                  | Duration                                      | PV              | PV       | NP           | I (S)         | NP [61,66]; PV [44,52]                   | PV [38-39,43]                                        | NP [36]                      |              |
|                                              | Intensity *                                   | PV              | PV       | PV           | PV (S)        | PV [41,44,46-47,52-53,57-62,66]          | PV [38-39,51,55,65]                                  | PV [36,40,48]                |              |
|                                              | Intensity - back                              | N               | PV       | PV           | PV (W)        |                                          | PV [51,56]                                           | PV [66]                      |              |
|                                              | Intensity - leg                               | I               | PV       | PV           | PV (S)        | NP [47]; PV [41]                         | PV [56]                                              | PV [36,66]                   |              |
|                                              | Interference daily activities                 | PV              | PV       | PV           | PV (S)        | PV [47](bothersomeness)                  |                                                      | PV [36]                      |              |
|                                              | Frequency / preceding (prior) episodes *      | I               | N        | N            | I (S)         | NP [41,52]; PV [44,46]                   |                                                      |                              |              |
| <b>Somatic<br/>Physical &amp; Biological</b> | Strength, endurance, mobility                 | I               | I        | NP           | NP (S)        | NP [41]; PV [53]                         | NP [55]; I [39]                                      | NP [36,40]                   |              |
|                                              | Centralization phenomenon                     | N               | N        | NP           | NP (S)        |                                          |                                                      | NP [36]                      |              |
|                                              | Postural control, psychomotor speed           | N               | N        | NP           | NP (S)        |                                          |                                                      | NP [36]                      |              |
|                                              | Diagnosis; comorbidities *                    | I               | PV       | NP           | PV (S)        | NP [66]; PV [44]                         | PV [43](comorbidity),[65](comorbidity)               | NP [66]                      |              |
|                                              | Bulging or protruded disc *                   | PV              | PV       | N            | PV (S)        | PV [41,52]                               | PV [38]                                              |                              |              |
|                                              | Loss of neurological function *               | PV              | PV       | PV           | PV (S)        | PV [46]                                  | PV [38]                                              | PV [66]                      |              |
|                                              | Red Flags (n= 10) *                           | N               | PV       | PV           | PV (S)        |                                          |                                                      |                              |              |
| <b>Psychologic</b>                           | <i>Psychic affect</i>                         |                 |          |              |               |                                          |                                                      |                              |              |
|                                              | Distress *                                    | PV              | PV       | PV           | PV (S)        | NP [67]; PV [42,44-47,49-50,53]          | PV [38-39,43,65]                                     | PV [40]; I [36]              |              |
|                                              | Anxiety *                                     | PV              | PV       | PV           | PV (S)        | NP [47]; PV [42,44-46; 49-50,53,66]      | PV [38-39]                                           | PV [66]                      |              |
|                                              | <i>Cognition</i>                              |                 |          |              |               |                                          |                                                      |                              |              |
|                                              | Catastrophizing *                             | PV              | PV       | PV           | PV (S)        | PV [41-42,44-45,47,49-50,54,58,60-62,66] | PV [39,56]                                           | PV [40,48]                   |              |
|                                              | Somatization *                                | PV              | PV       | N            | PV (S)        | NP [66]; PV [41-42,45]                   | PV [38-39]                                           |                              |              |
|                                              | Intelligence                                  | N               | N        | I            | I (S)         |                                          |                                                      | I [36]                       |              |
|                                              | Coping *                                      | PV              | PV       | PV           | PV (S)        | NP [47]; PV [41-42,44-46]                | PV [38-39,55]                                        | PV [36,40]                   |              |
|                                              | <i>Behaviour</i>                              |                 |          |              |               |                                          |                                                      |                              |              |
|                                              | Self-efficacy (including Readiness to Change) | PV              | N        | N            | PV (W)        | PV [59](self-efficacy)                   |                                                      |                              |              |
|                                              | Fear of Movement / (re)injury *               | PV              | PV       | PV           | PV (W)        | PV [41-42,44-47(pain),49,52,54,57-62,66] | PV [55-56]                                           | PV [40,66]                   |              |
|                                              | Avoidance & persistence                       | PV              | PV       | N            | PV (W)        | PV [50]                                  |                                                      |                              |              |
| Expectations - work return *                 | PV                                            | I               | N        | PV (S)       | PV [37,44-45] | NP [55]; PV [56]                         |                                                      |                              |              |
| Expectations - outcome / recovery *          | PV                                            | PV              | N        | PV (S)       | PV [37,53]    | PV [43,55]                               |                                                      |                              |              |
| <b>Functioning<br/>&amp; Quality of Life</b> | Functioning in daily activities & walking     | PV              | PV       | PV           | PV (S)        | NP [67]; PV [41,44,46-47,52-53]          | PV [38-39,51,55-56,63](functioning),[43,65](walking) | PV [36,40,48], [66](walking) |              |
|                                              | Health (related physical QoL)                 | I               | PV       | PV           | PV (S)        | NP [53,67]; PV [41,45]                   | PV [43,56,63-64]                                     | PV [36]                      |              |
|                                              | Health (related mental QoL)                   | I               | PV       | N            | I (S)         | NP [53]; PV [41,45]                      | PV [43,51,56,63-64]                                  |                              |              |
|                                              | General perceived health                      | N               | PV       | N            | PV (W)        | NP [41]; PV [53]                         | PV [56]                                              |                              |              |

|                                       |                                                 |                                                                                                 |                                                                                                                                                   |
|---------------------------------------|-------------------------------------------------|-------------------------------------------------------------------------------------------------|---------------------------------------------------------------------------------------------------------------------------------------------------|
| * International Guidelines [22,23,31] | PV= Predictive value<br>NP= No predictive value | (W) weak = studies or narrative reviews<br>(S) strong = studies & reviews or systematic reviews | <b>References used:</b><br>Systematic reviews [36-43]<br>Narrative reviews [44-47]<br>Randomised studies [48-50]<br>Observational studies [51-68] |
| OUT                                   | I = Inconclusive evidence                       |                                                                                                 |                                                                                                                                                   |
| IN                                    | N = No evidence available                       |                                                                                                 |                                                                                                                                                   |
